# Supplementary material
Source: PubMed Central journal article supplement (PMC2435129)

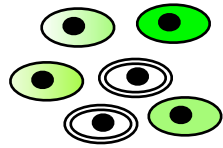

44 hr after transfection

↓  
Fluorescence microscopy

↓  
Lyse cells

- ↓
- Save 5% for Western blot
  - Save 20% for Northern blot

↓  
Pellet

- ↓
- Wash 2X

↓  
Nuclei

↓  
Extract Nuclear RNA  
with Trizol

**A**

**Apobec3G (Chr. 22)**

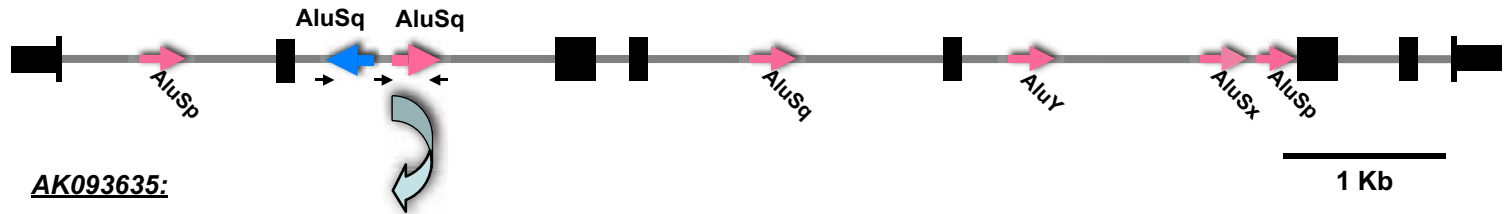

**AK093635:**

```

GGGTGGCTCG CACCTCTAAT CCCgGCACTT TGGGAGGCCA AGGCGGGCgG 150
ATCgCCTGAg GTTAGATATT CAAAACCGGC CTGGGCAACg TGGTGggATC 200
CCATCTCTAC TAAAAATACA AAAAAAAAAA AgTTAGCCAG GCATGGTGGC 250
gGTCACCTGT ggTCCCAGCT ACTCGGGAGG CTGAGGCgGG AGAACCGCTT 300
GATCCCATGA GGCAGAGGTT GTAGTGAGCC gAGATTGcgT CCTTGCATTC 350
  
```

9-14 edits reported

**B**

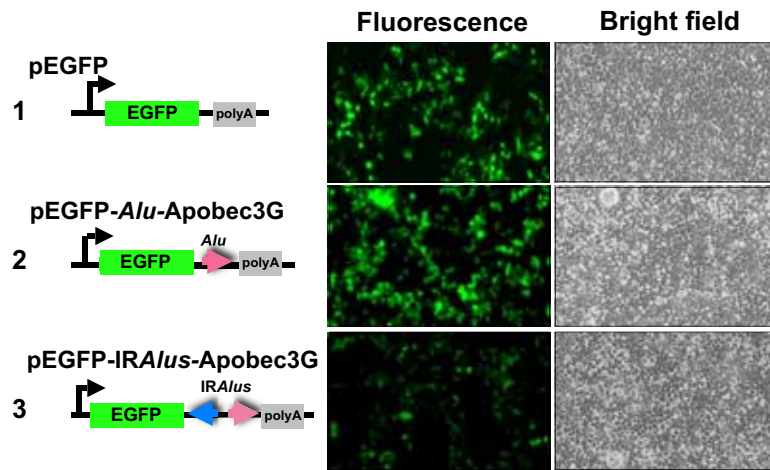

**C**

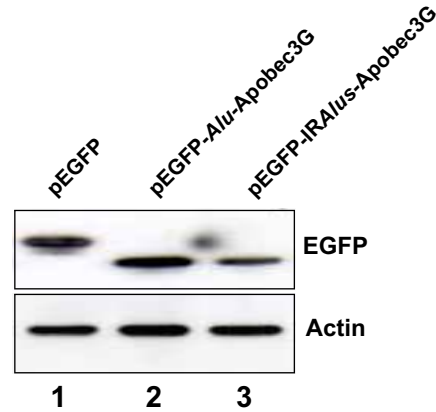

**D**

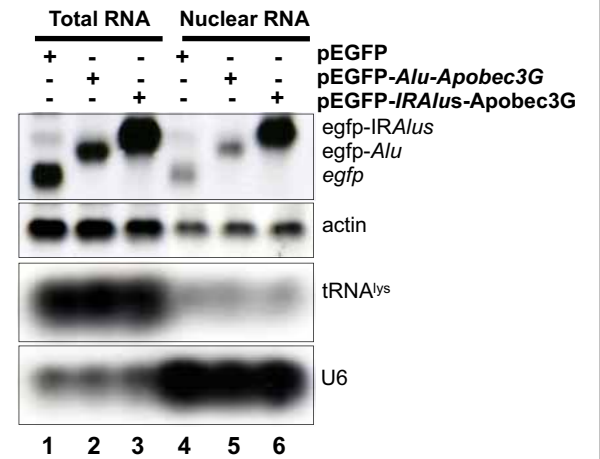

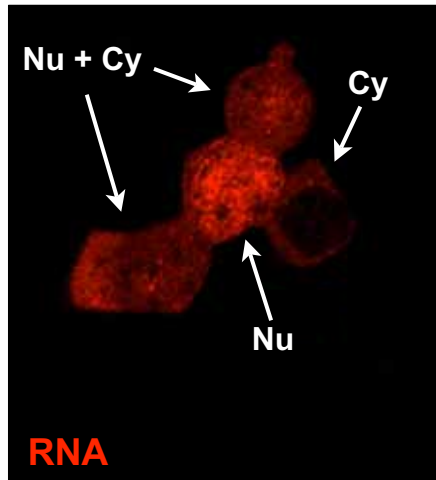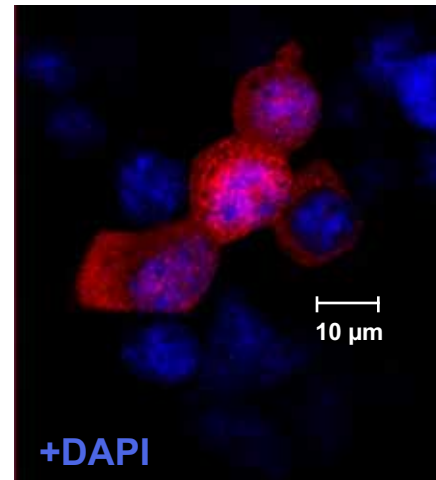

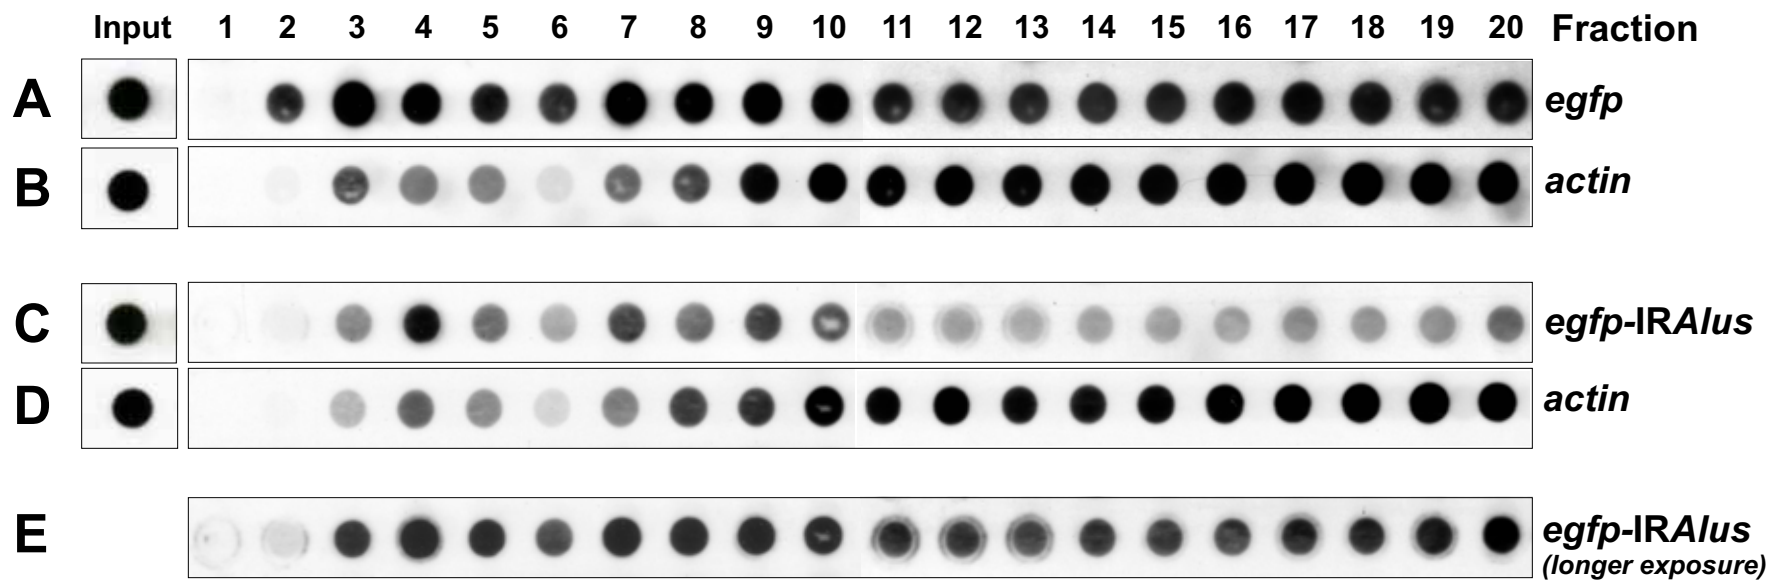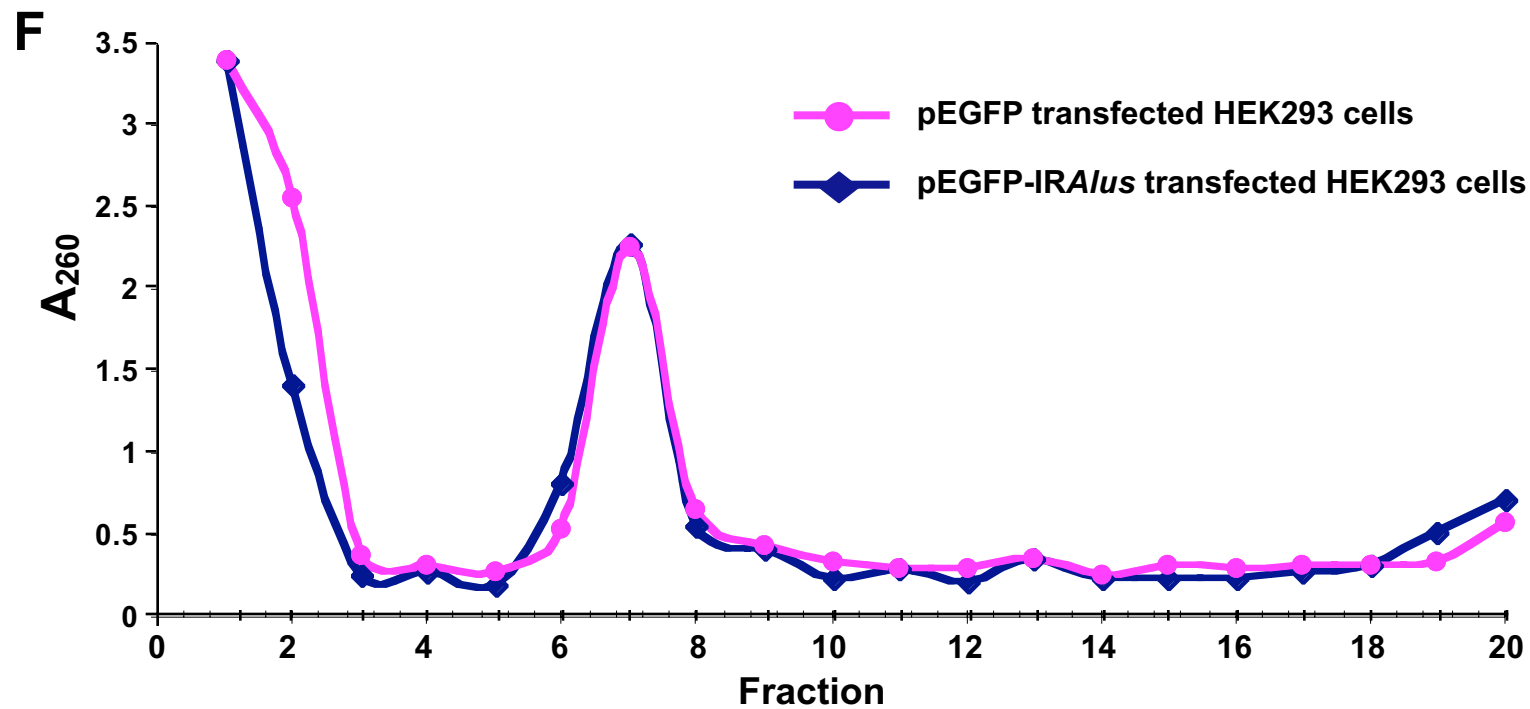

**A**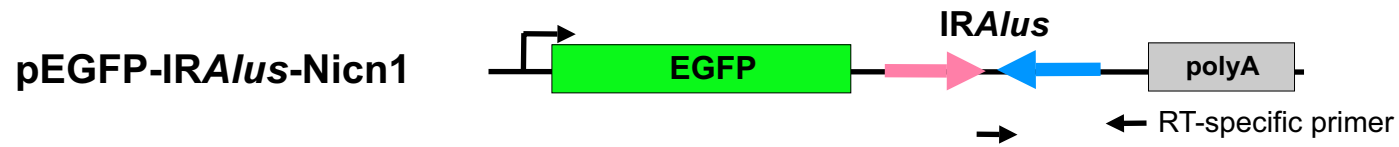

|             | 151                                                                                                  | 171 | 191 | 211 | 231 | 251 |
|-------------|------------------------------------------------------------------------------------------------------|-----|-----|-----|-----|-----|
| Genomic DNA | ATCACCATGCCTGGCTAATTTTGTATTTGTAGTAGAGATGGGGTTTCTCCATGTTGGTCAGGCTGGTCTCAAACACCTGACCTCAGGTGATCTGCCTGCC |     |     |     |     |     |
| AK094248    | ATCACCATGCCTGGCTAgTTTTGTATTTGTgGTgGAGATGGGGTTTCTCCATGTTGGTCgGGCTGGTCTCagACACCTGACCTCAGGTGATCTGCCTGCC |     |     |     |     |     |
| Seq. 1      | ATCACCATGCCTGGCTAgTTTTGTgTTTGTAGTgGAGATGGGGTTTCTCCATGTTGGTCgGGCTGGTCTCgggCACCTGACCTCgGGTGgTCTGCCTGCC |     |     |     |     |     |
| Seq. 2      | ATCACCATGCCTGGCTAATTTTGTgTTTGTAGTgGAGATGGGGTTTCTCCATGTTGGTCgGGCTGGTCTCggACACCTGgCCTCgGGTGATCTGCCTGCC |     |     |     |     |     |
| Seq. 3      | ATCACCATGCCTGGCTAgTTTTGTATTTGTAGTgGAGATGGGGTTTCTCCATGTTGGTCgGGCTGGTCTCggACACCTGACCTCAGGTGATCTGCCTGCC |     |     |     |     |     |
| Seq. 4      | ATCACCATGCCTGGCTggTTTTGTATTTGTAGTgGAGATGGGGTTTCTCCATGTTGGTCgGGCTGGTCTCggACACCTGACCTCgGGTGATCTGCCTGCC |     |     |     |     |     |

**B**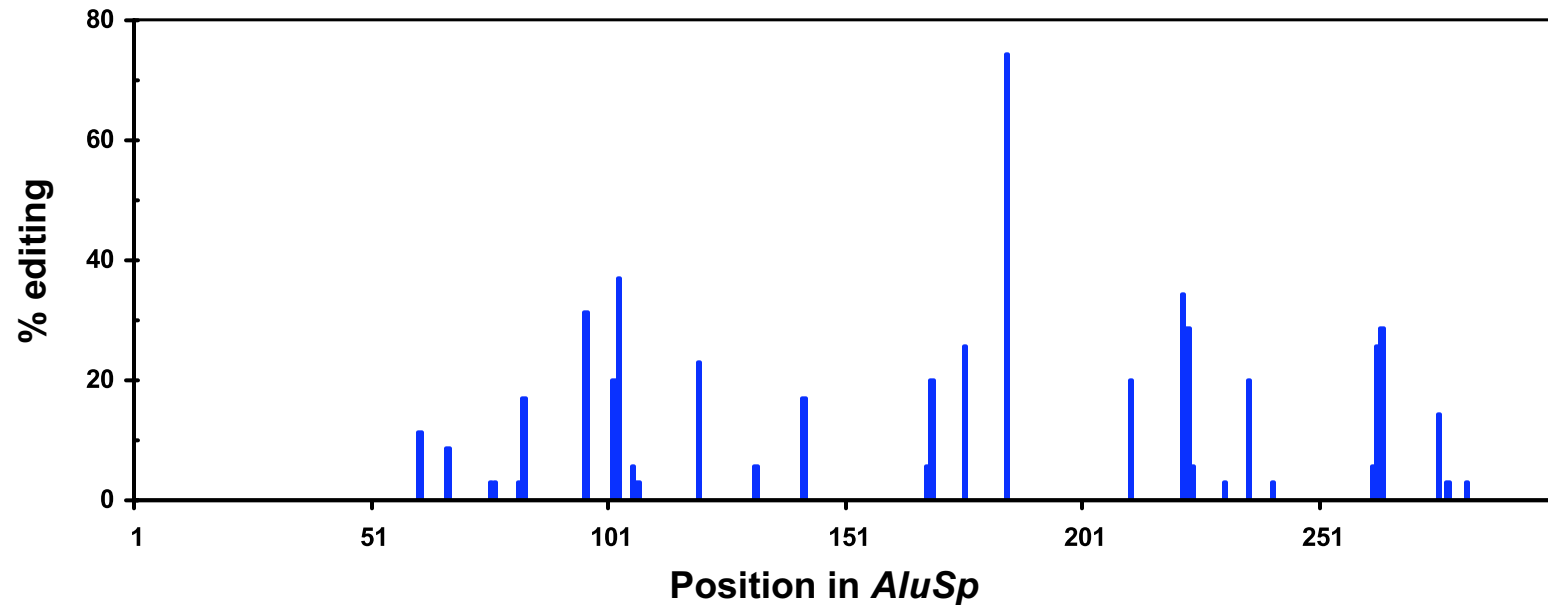

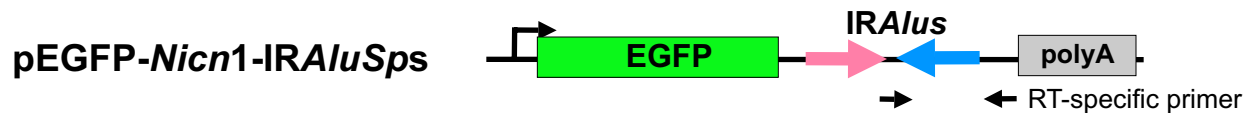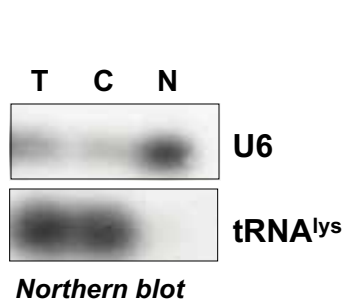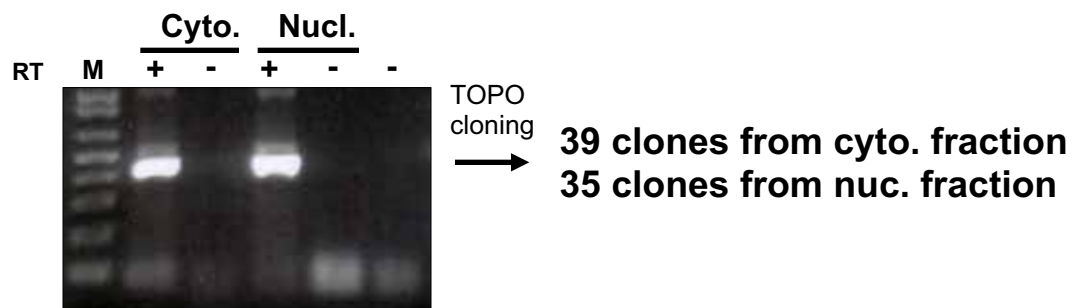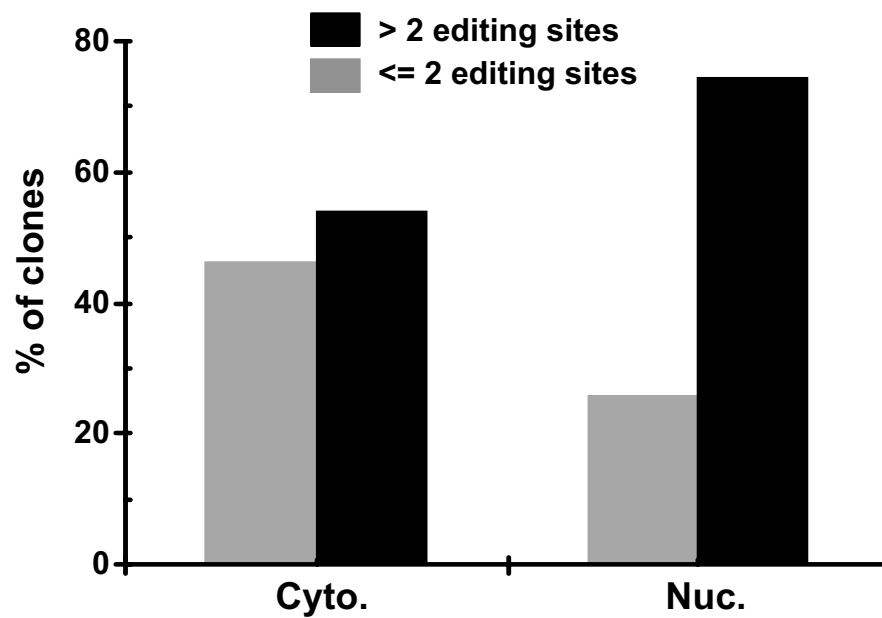

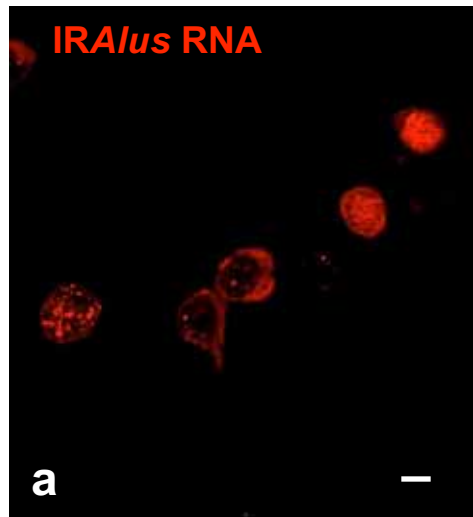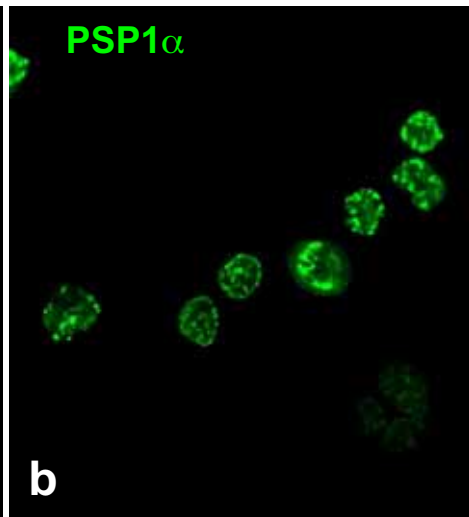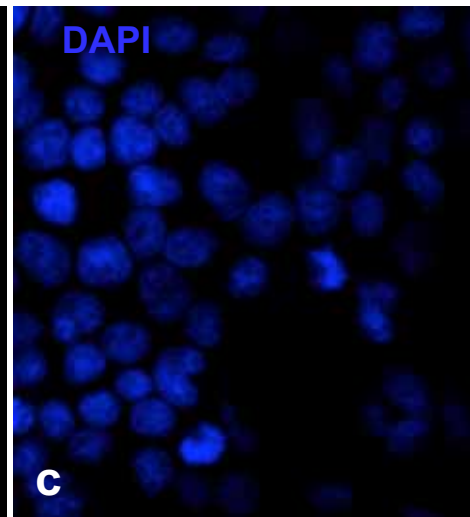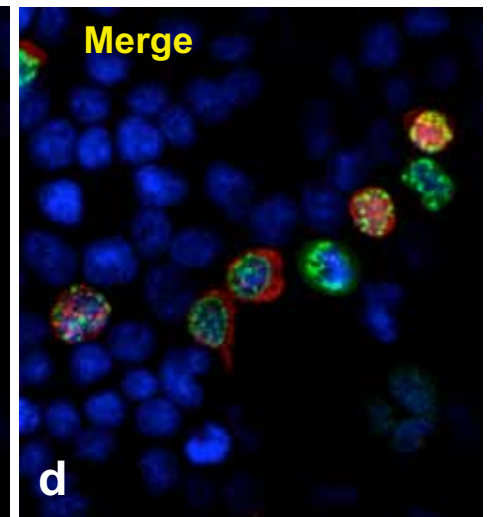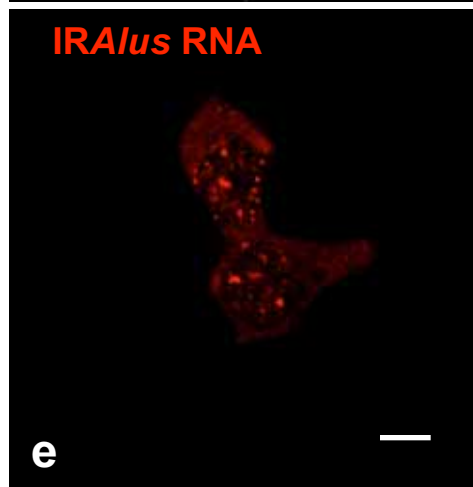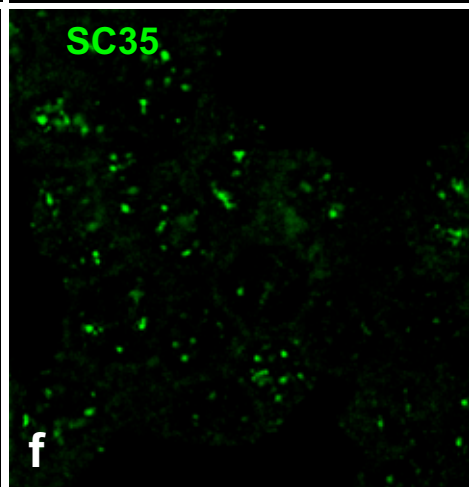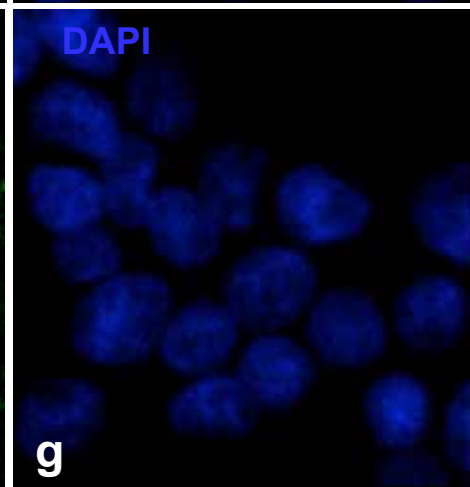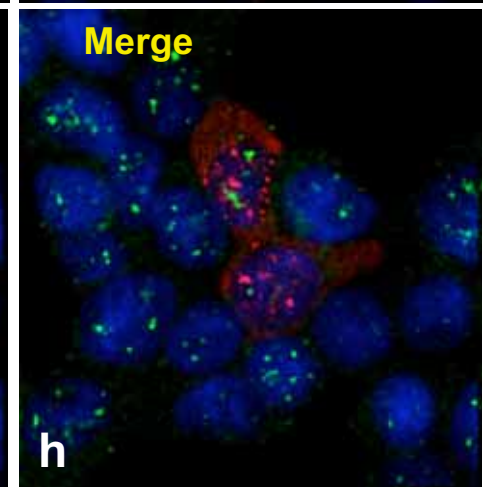

pEGFP-*Alu*-Lin28

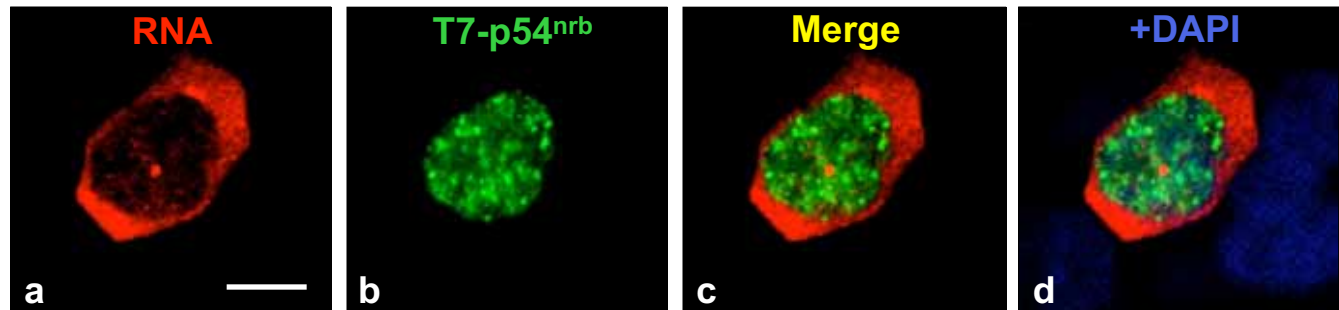

pEGFP-*IRA/**us*-Lin28

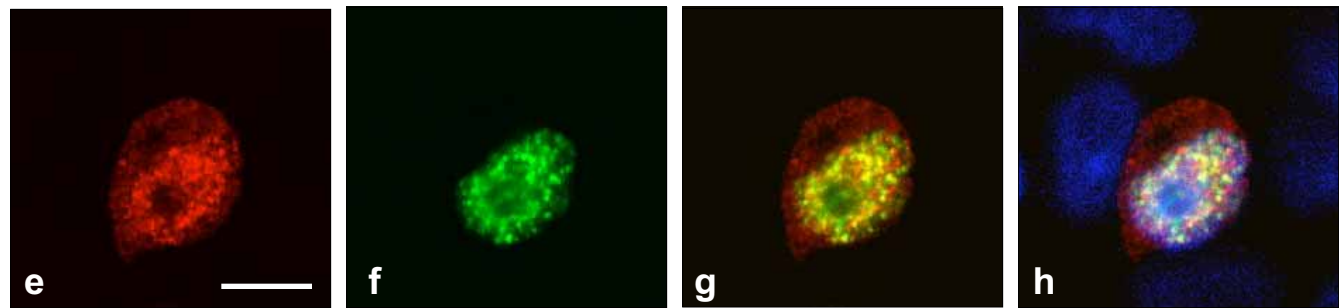



**A**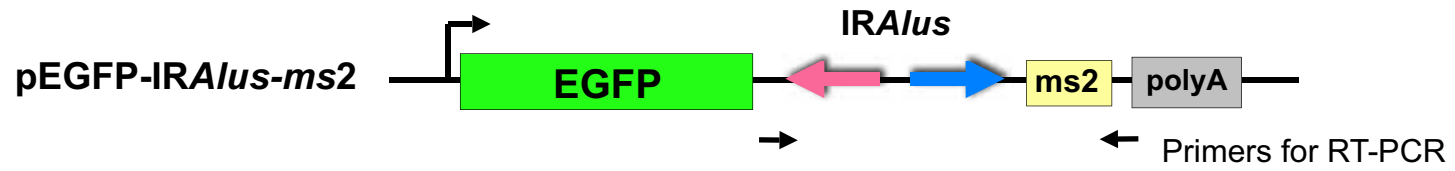**B**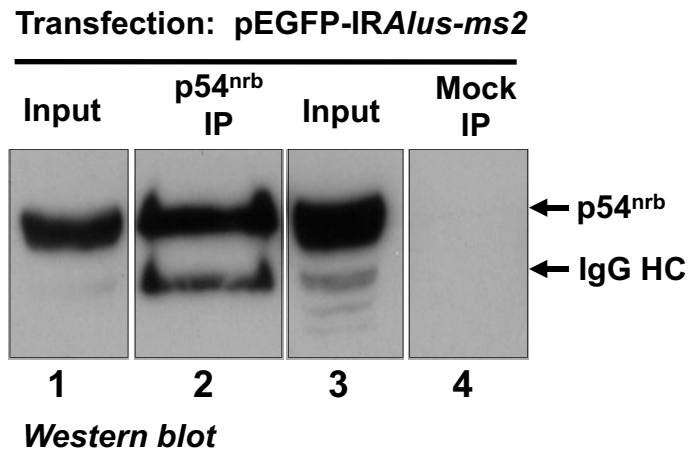**C**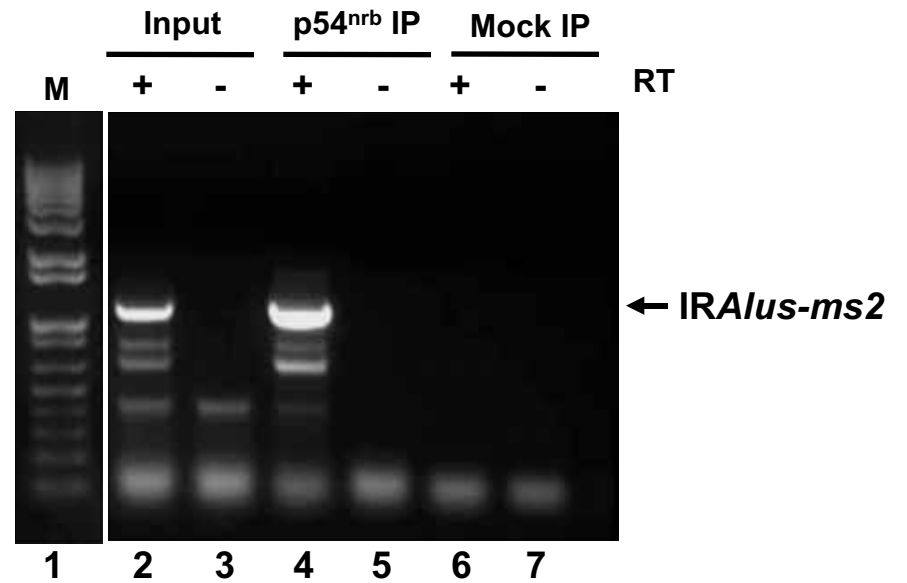

**A**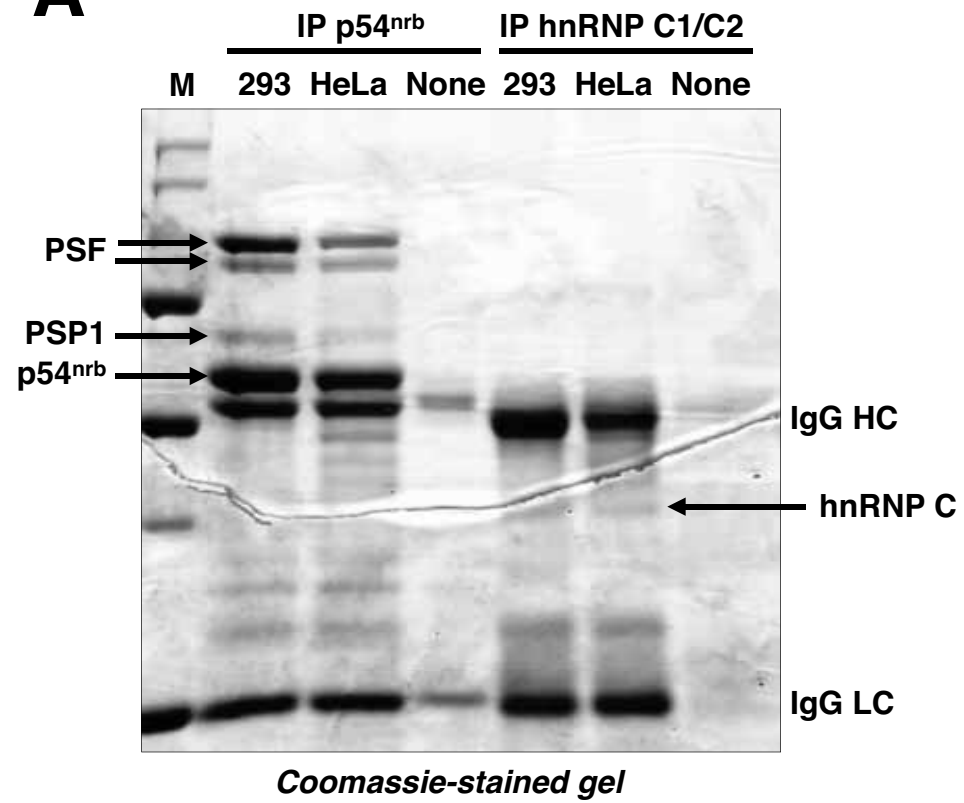**B**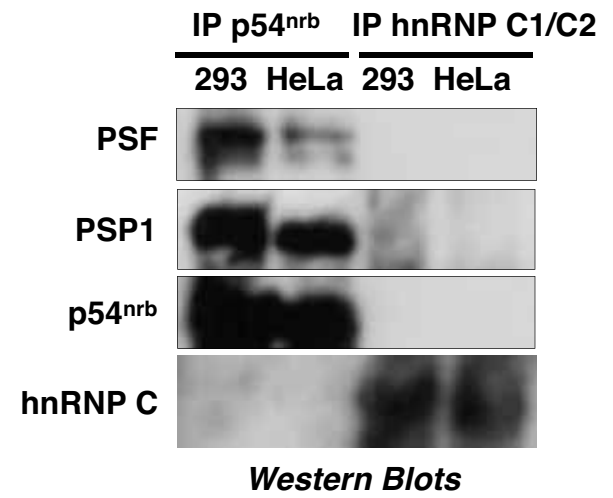

**A**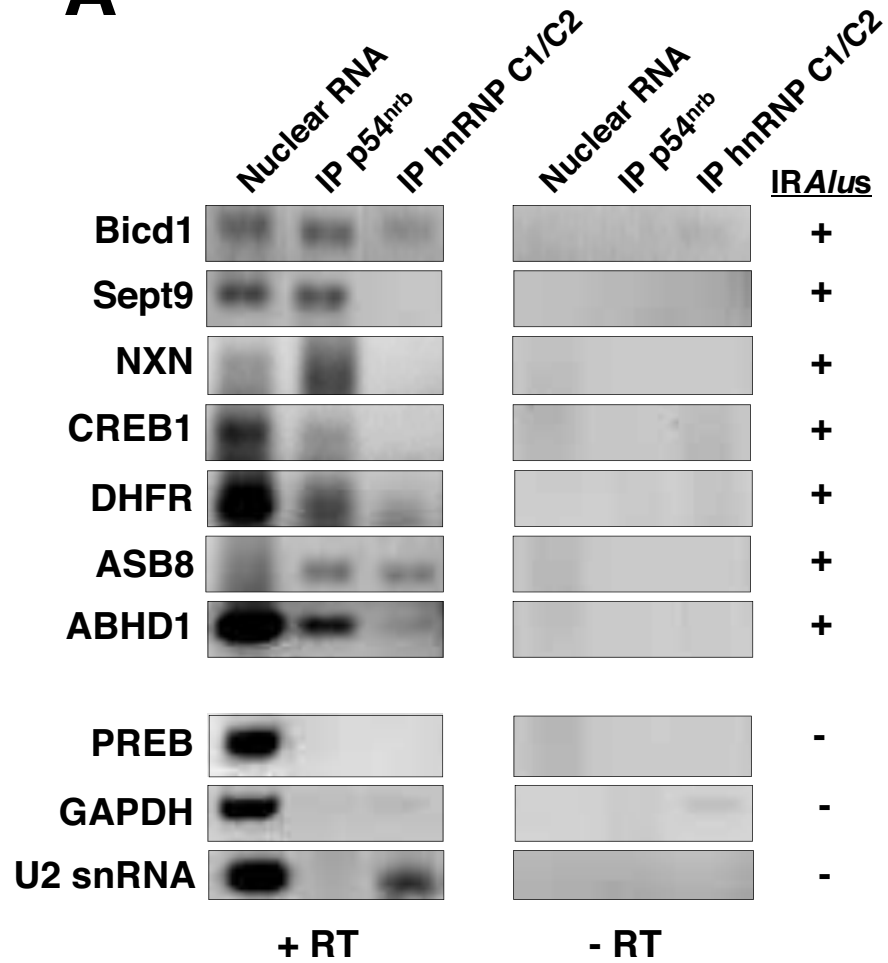**B**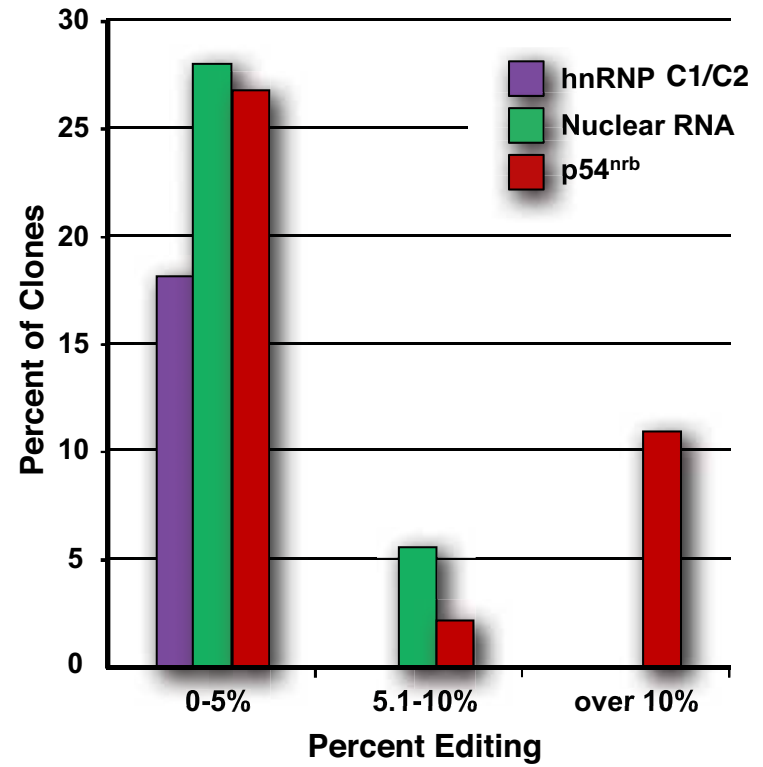

Supplement: emboj200894s1.pdf [file emboj200894s1.pdf]
